# Supplementary material for: [Retracted] Novel Therapeutic Mechanism of Adipose‐Derived Mesenchymal Stem Cells in Osteoarthritis via Upregulation of BTG2
Source: Hindawi journal article supplement (doi:10.1155/2022/9252319), 2022-01-01

**A**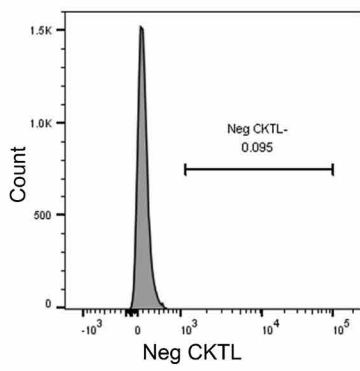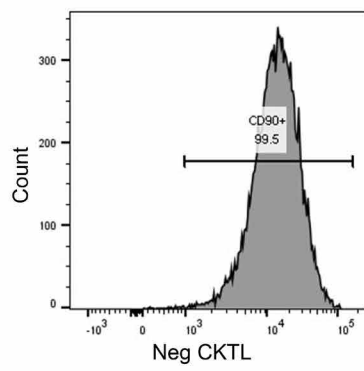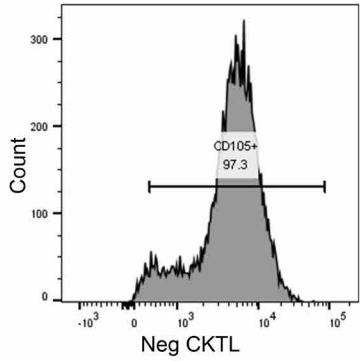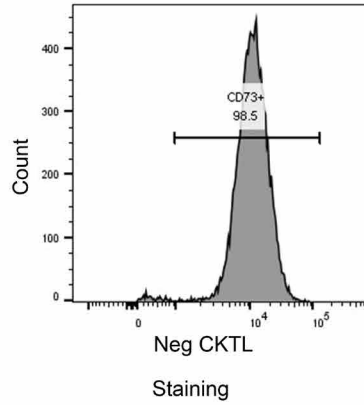**B**

Phase contrast

Staining

Osteogenesis

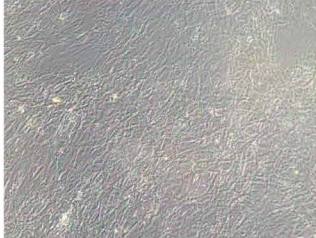

Alizarin red

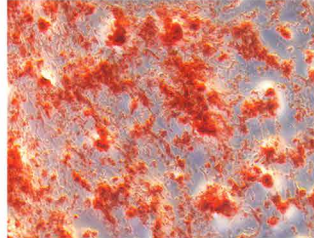

Adipogenesis

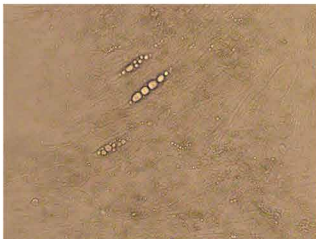

Oil red

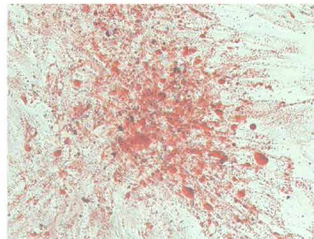

Chondrogenesis

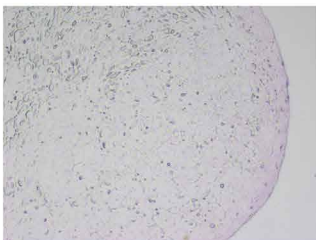

Alcian blue

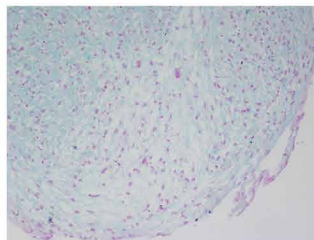

Supplement: f1 [file 9252319.f1.pdf]
