# Supplementary figures and images for: [Retracted] Novel Therapeutic Mechanism of Adipose‐Derived Mesenchymal Stem Cells in Osteoarthritis via Upregulation of BTG2
Source: Hindawi journal article supplement (doi:10.1155/2022/9252319), 2022-01-01

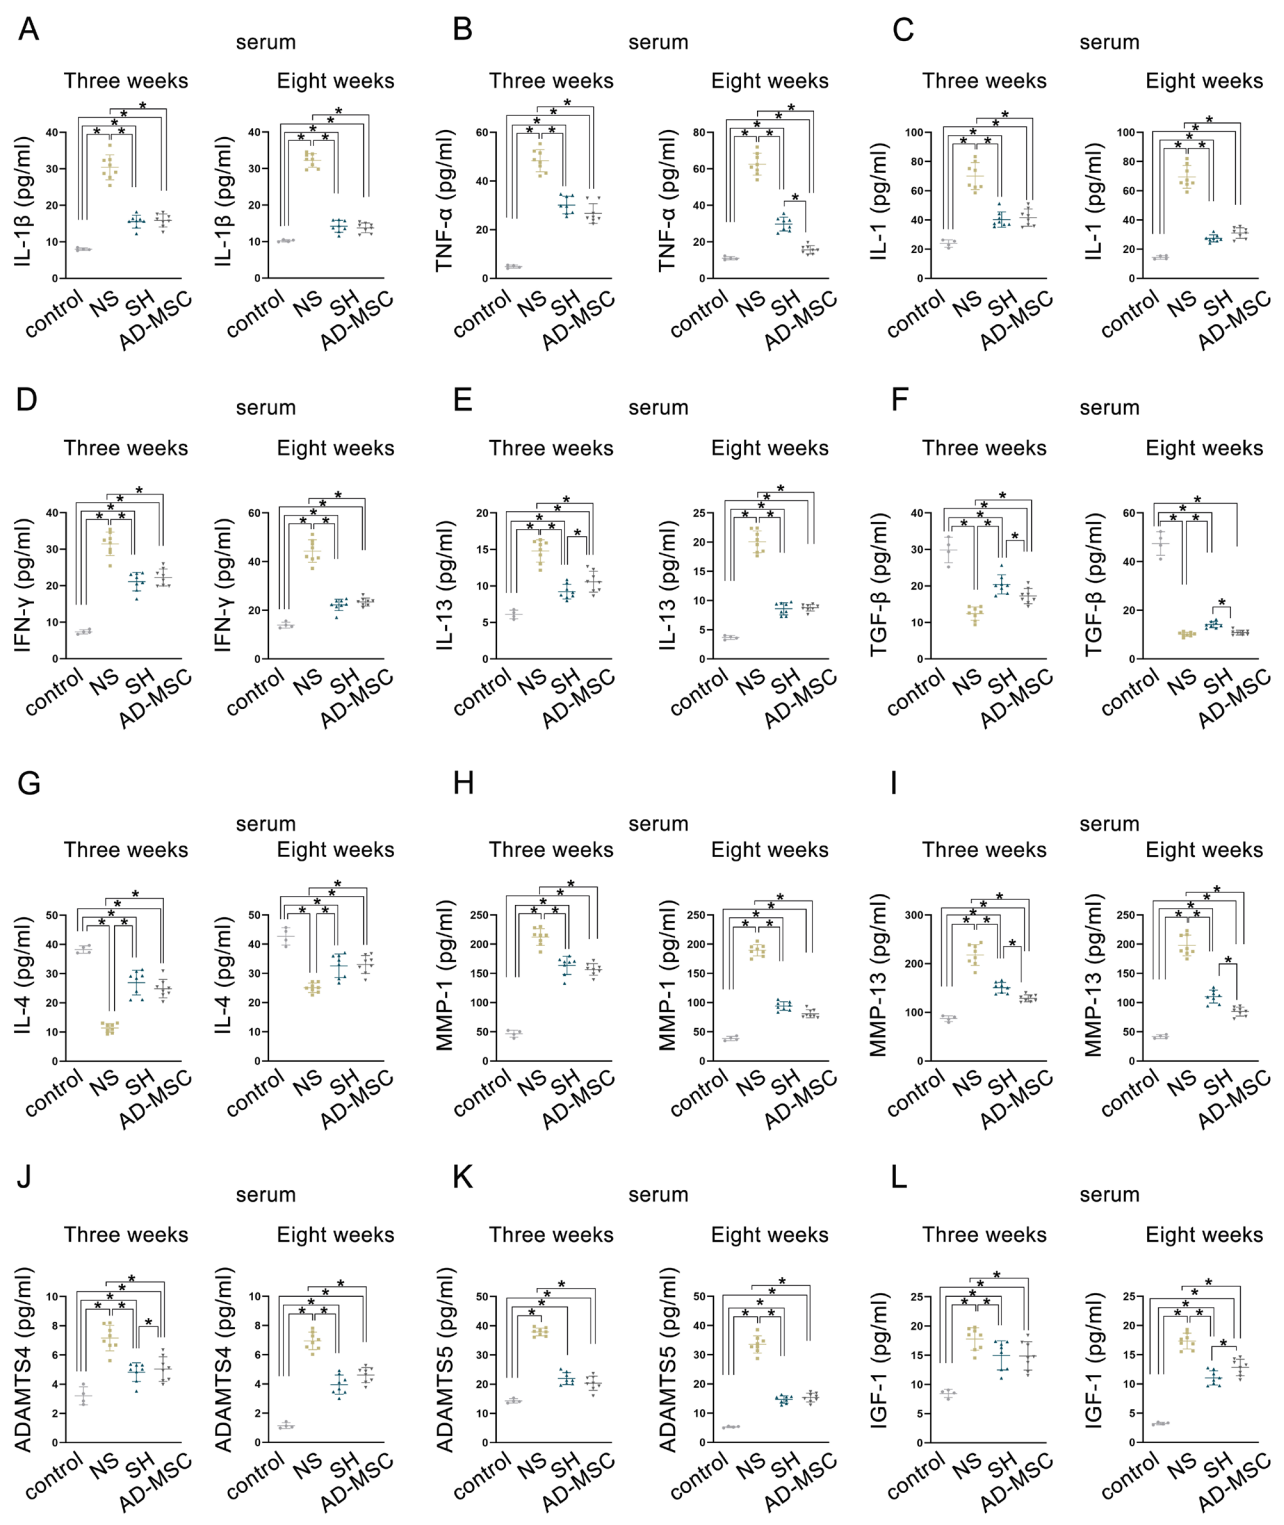

Supplement: f2 [file 9252319.f2.pdf]

A

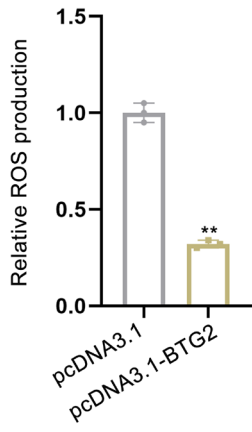

B

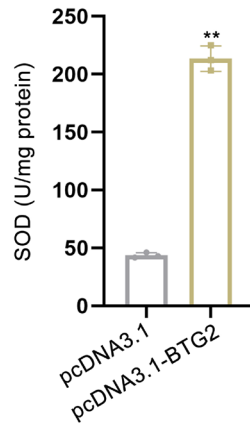

Supplement: f3 [file 9252319.f3.pdf]

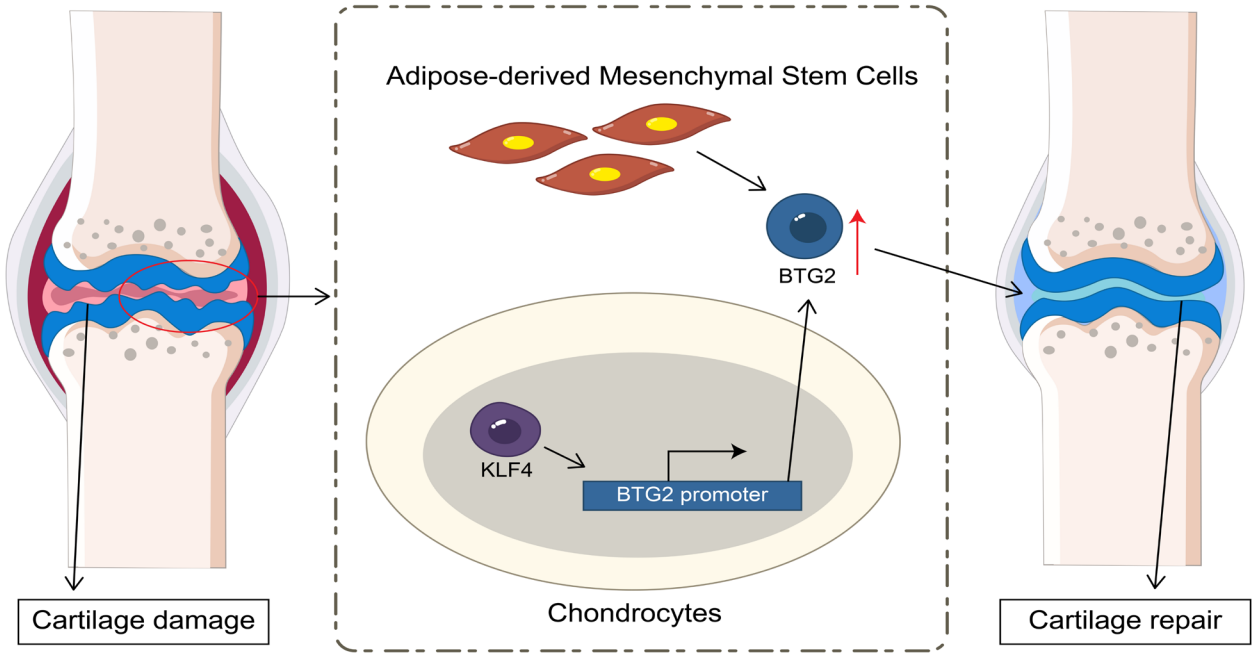

Supplement: f4 [file 9252319.f4.pdf]
